# Supplementary material for: Long-Term Exposure to Traffic-Related Air Pollution and Risk of Incident Atrial Fibrillation: A Cohort Study
Source: PubMed Central journal article supplement (PMC5332191; doi:10.1289/ehp392), 2016-07-29
Supplement: EHP392.s001.acco.pdf [file EHP392.s001.acco.pdf]

**Note to readers with disabilities:** *EHP* strives to ensure that all journal content is accessible to all readers. However, some figures and Supplemental Material published in *EHP* articles may not conform to [508 standards](#) due to the complexity of the information being presented. If you need assistance accessing journal content, please contact [ehp508@niehs.nih.gov](mailto:ehp508@niehs.nih.gov). Our staff will work with you to assess and meet your accessibility needs within 3 working days.

## **Supplemental Material**

# **Long-Term Exposure to Traffic-Related Air Pollution and Risk of Incident Atrial Fibrillation: A Cohort Study**

Maria Monrad, Ahmad Sajadieh, Jeppe Schultz Christensen, Matthias Ketzel, Ole Raaschou-Nielsen, Anne Tjønneland, Kim Overvad, Steffen Loft, and Mette Sørensen

### **Table of Contents**

**Table S1:** Association between 1- and 5-years residential exposure to NO<sub>2</sub> and NO<sub>x</sub> and risk of atrial fibrillation

**Table S2:** Associations between established risk factor and risk of atrial fibrillation in the Diet, Cancer and Health cohort.

**Figure S1:** Exposure-response relationship between 1-year time-weighted mean NO<sub>x</sub> and risk of atrial fibrillation. The vertical whiskers show incidence rate ratios with 95 % confidence interval at the median of exposure categories (deciles).

**Figure S2:** Exposure-response relationship between 1-year time-weighted mean NO<sub>2</sub> and risk of atrial fibrillation. The vertical whiskers show incidence rate ratios with 95 % confidence interval at the median of exposure categories (deciles).

**Figure S3:** Exposure-response relationship between 10-years time-weighted mean NO<sub>x</sub> and risk of atrial fibrillation. The vertical whiskers show incidence rate ratios with 95 % confidence interval at the median of exposure categories (deciles).

**Figure S4:** Exposure-response relationship between 10-years time-weighted mean NO<sub>2</sub> and risk of atrial fibrillation. The vertical whiskers show incidence rate ratios with 95 % confidence interval at the median of exposure categories (deciles).

**Table S1:** Association between 1- and 5-years residential exposure to NO<sub>2</sub> and NO<sub>x</sub> and risk of atrial fibrillation

| Air pollution                                | Cases | Crude IRR (95% CI) * | Adjusted IRR (95% CI) † |
|----------------------------------------------|-------|----------------------|-------------------------|
| <b>1-year mean NO<sub>2</sub></b>            |       |                      |                         |
| Q1: < 10.3                                   | 538   | 1.00 (ref.)          | 1.00 (ref.)             |
| Q2: 10.3- 11.8 µg/m <sup>3</sup>             | 541   | 1.13 (1.00-1.28)     | 1.14 (1.01-1.29)        |
| Q3: 11.8- 14.3 µg/m <sup>3</sup>             | 541   | 1.15 (1.03-1.30)     | 1.16 (1.03-1.31)        |
| Q4: 14.3- 18.1 µg/m <sup>3</sup>             | 539   | 1.20 (1.06-1.35)     | 1.21 (1.06-1.37)        |
| Q5: ≥ 18.1 µg/m <sup>3</sup>                 | 541   | 1.22 (1.08-1.38)     | 1.22 (1.07-1.39)        |
| <i>Linear trend per 10 µg/m<sup>3</sup>‡</i> | 2,700 | 1.07 (1.01-1.14)     | 1.07 (1.00-1.13)        |
| <b>5-year mean NO<sub>2</sub></b>            |       |                      |                         |
| Q1: < 10.9 µg/m <sup>3</sup>                 | 540   | 1.00 (ref.)          | 1.00 (ref.)             |
| Q2: 10.9-12.4 µg/m <sup>3</sup>              | 539   | 1.04 (0.93-1.18)     | 1.05 (0.93-1.18)        |
| Q3: 12.4-15.2 µg/m <sup>3</sup>              | 540   | 1.13 (1.00-1.27)     | 1.14 (1.01-1.29)        |
| Q4: 15.2-19.0 µg/m <sup>3</sup>              | 541   | 1.24 (1.10-1.39)     | 1.24 (1.10-1.40)        |
| Q5: ≥ 19.0 µg/m <sup>3</sup>                 | 540   | 1.18 (1.05-1.34)     | 1.19 (1.05-1.36)        |
| <i>Linear trend per 10 µg/m<sup>3</sup>‡</i> | 2,700 | 1.09 (1.03-1.15)     | 1.08 (1.02-1.15)        |
| <b>1-year mean NO<sub>x</sub></b>            |       |                      |                         |
| Q1: < 11.4 µg/m <sup>3</sup>                 | 539   | 1.00 (ref.)          | 1.00 (ref.)             |
| Q2: 11.4-13.3 µg/m <sup>3</sup>              | 541   | 1.14 (1.01-1.28)     | 1.15 (1.02-1.30)        |
| Q3: 13.3-16.1 µg/m <sup>3</sup>              | 539   | 1.18 (1.04-1.32)     | 1.19 (1.05-1.34)        |
| Q4: 16.1-20.1 µg/m <sup>3</sup>              | 541   | 1.21 (1.07-1.36)     | 1.22 (1.07-1.38)        |
| Q5: ≥ 20.1 µg/m <sup>3</sup>                 | 540   | 1.23 (1.09-1.38)     | 1.23 (1.08-1.14)        |
| <b>5-year mean NO<sub>x</sub></b>            |       |                      |                         |
| Q1: < 13.8 µg/m <sup>3</sup>                 | 539   | 1.00 (ref.)          | 1.00 (ref.)             |

|                                          |     |                  |                  |
|------------------------------------------|-----|------------------|------------------|
| Q2: 13.8 < 16.9 $\mu\text{g}/\text{m}^3$ | 541 | 1.06 (0.94-1.19) | 1.06 (0.94-1.20) |
| Q3: 16.9 < 20.8 $\mu\text{g}/\text{m}^3$ | 539 | 1.22 (1.08-1.38) | 1.24 (1.10-1.41) |
| Q4: 20.8 < 29.6 $\mu\text{g}/\text{m}^3$ | 540 | 1.19 (1.05-1.34) | 1.19 (1.05-1.35) |
| Q5: $\geq 29.6 \mu\text{g}/\text{m}^3$   | 541 | 1.23 (1.09-1.39) | 1.23 (1.08-1.40) |

---

IRR, Incidence rate ratio; CI, confidence interval; Q1-Q5, quintiles 1-5.

\* Adjusted for age

† Adjusted for age, sex, body mass index, waist circumference, smoking status, smoking duration, smoking intensity, intake of alcohol, sport during leisure time, length of school attendance, area level socioeconomic position and calendar year.

‡ Linear association per 10  $\mu\text{g}/\text{m}^3$  increase in  $\text{NO}_2$  exposure

**Table S2:** Associations between established risk factor and risk of atrial fibrillation in the Diet, Cancer and Health cohort.

| Characteristic at enrolment | Per increase in interquartile range | IRR (95 % CI)    |
|-----------------------------|-------------------------------------|------------------|
| NO <sub>2</sub> *           | 6.76 µg/m <sup>3</sup>              | 1.05 (1.00-1.09) |
| Sex                         |                                     |                  |
| Women                       |                                     | ref.             |
| Men                         |                                     | 2.13 (1.97-2.30) |
| Smoking status              |                                     |                  |
| Never                       |                                     | ref.             |
| Former                      |                                     | 1.16 (1.06-1.28) |
| Current                     |                                     | 1.17 (1.07-1.28) |
| Smoking duration†           | 18 years                            | 1.07 (1.00-1.15) |
| Alcohol intake ‡            | 25.0 g/day                          | 1.26 (1.22-1.31) |
| BMI                         | 4.94 kg/m <sup>2</sup>              | 1.39 (1.34-1.45) |
| Waist circumference (cm)    | 18 cm                               | 1.83 (1.74-1.92) |

IRR, Incidence rate ratio; CI, confidence interval

\* Baseline NO<sub>2</sub>

† Among present and former smokers

‡ Among drinkers

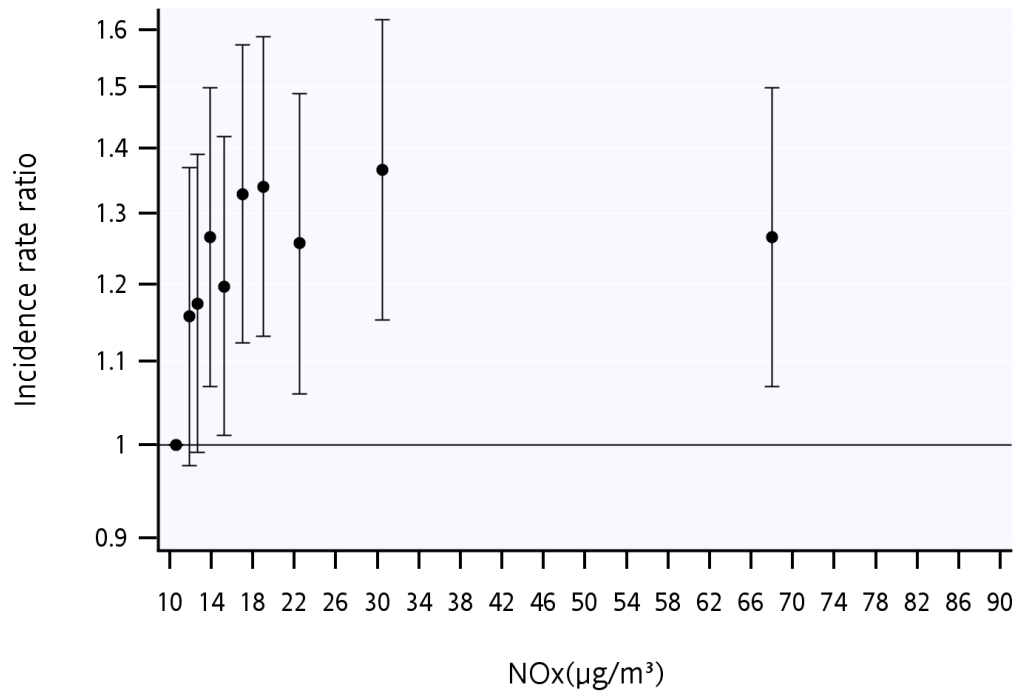

**Figure S1:** Exposure-response relationship between 1-year time-weighted mean NO<sub>x</sub> and risk of atrial fibrillation. The vertical whiskers show incidence rate ratios with 95 % confidence interval at the median of exposure categories (deciles).

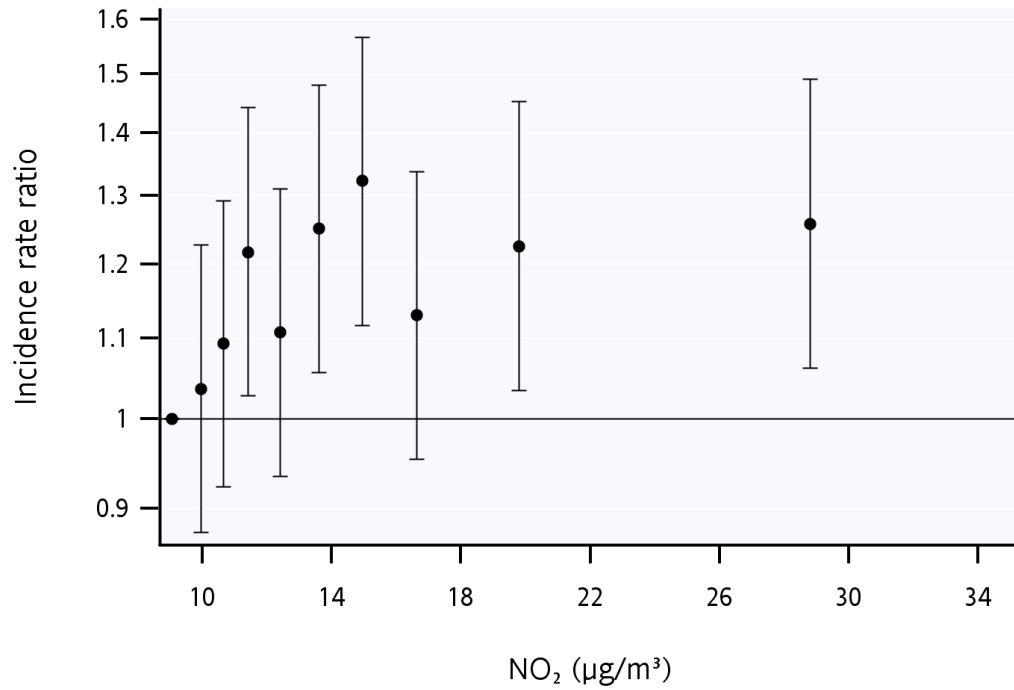

**Figure S2:** Exposure-response relationship between 1-year time-weighted mean NO<sub>2</sub> and risk of atrial fibrillation. The vertical whiskers show incidence rate ratios with 95 % confidence interval at the median of exposure categories (deciles).

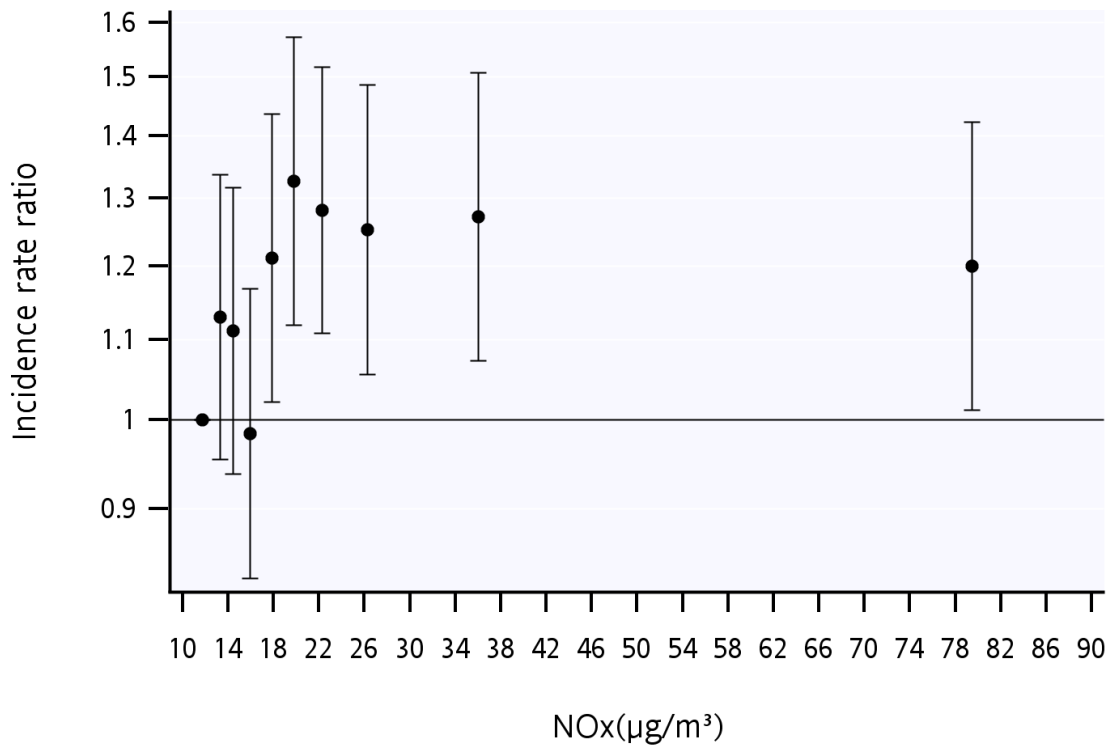

**Figure S3:** Exposure-response relationship between 10-years time-weighted mean NO<sub>x</sub> and risk of atrial fibrillation. The vertical whiskers show incidence rate ratios with 95 % confidence interval at the median of exposure categories (deciles).

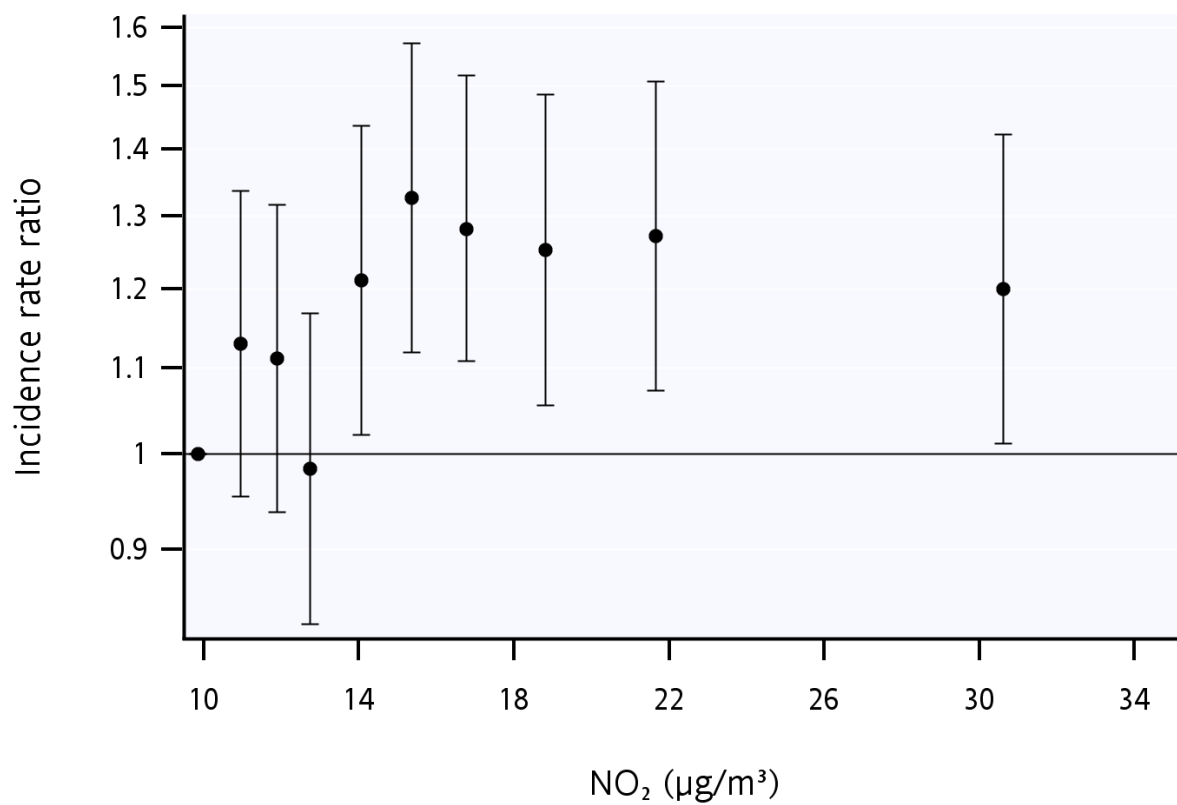

**Figure S4:** Exposure-response relationship between 10-years time-weighted mean NO<sub>2</sub> and risk of atrial fibrillation. The vertical whiskers show incidence rate ratios with 95 % confidence interval at the median of exposure categories (deciles).
